# Supplementary material for: Examining the Nutritional Quality of Canadian Packaged Foods and Beverages with and without Nutrition Claims
Source: PubMed Central journal article supplement (PMC6073495; doi:10.3390/nu10070832), 2018-06-27
Supplement: nutrients-10-00832-s001.pdf [file nutrients-10-00832-s001.pdf]

## Supplemental Material: Examining the nutritional quality of Canadian packaged foods and beverages with and without nutrition claims

Supplementary Table 1. Simplified Canadian nutrition claims taxonomy.

| Nutrient Content Claims <sup>1,2</sup>                                                | Examples of prescribed wording                                                                                                                                                                            |
|---------------------------------------------------------------------------------------|-----------------------------------------------------------------------------------------------------------------------------------------------------------------------------------------------------------|
| <b>Vitamins and minerals</b>                                                          | Contains vitamins, source of X vitamin(s), contains X essential nutrients, high in X vitamin(s)/mineral(s), higher in X vitamin(s)/mineral(s), reduced, free                                              |
| <b>Total fat</b>                                                                      | Free of fat, low in fat, reduced in fat, lower in fat, (%) fat free, no added fat                                                                                                                         |
| <b>Trans fat</b>                                                                      | Free of trans fat, reduced in trans fat                                                                                                                                                                   |
| <b>Fibre</b>                                                                          | Source of fibre, high source of fibre, very high source of fibre, more fibre                                                                                                                              |
| <b>Saturated fat</b>                                                                  | Free of saturated fat, low in saturated fat, reduced in saturated fat, lower in saturated fat                                                                                                             |
| <b>Cholesterol</b>                                                                    | Free of cholesterol, low in cholesterol, reduced in cholesterol, lower in cholesterol                                                                                                                     |
| <b>Sugar</b>                                                                          | Free of sugars, reduced in sugars, lower in sugars, no added sugars                                                                                                                                       |
| <b>Sodium</b>                                                                         | Free of sodium, low in sodium, reduced in sodium, lower in sodium, no added sodium, lightly salted                                                                                                        |
| <b>Protein</b>                                                                        | Source of protein, excellent source of protein, more protein                                                                                                                                              |
| <b>Polyunsaturated fatty acids (PUFAs)</b>                                            | Source of omega-3 PUFAs, source of omega-6 PUFAs                                                                                                                                                          |
| <b>Energy/Calories</b>                                                                | Free of energy, low in energy, reduced in energy, lower in energy, source of energy, more energy, light in energy                                                                                         |
| <b>Lean</b>                                                                           | Lean, extra lean                                                                                                                                                                                          |
| Disease Risk Reduction Claims <sup>1,3</sup>                                          | Examples of prescribed wording                                                                                                                                                                            |
| Sodium and hypertension                                                               | "A healthy diet containing foods high in potassium and low in sodium may reduce the risk of high blood pressure, a risk factor for stroke and heart disease. (Naming the food) is sodium-free."           |
| Calcium and osteoporosis                                                              | "A healthy diet with adequate calcium and vitamin D, and regular physical activity, help to achieve strong bones and may reduce the risk of osteoporosis. (Naming the food) is a good source of calcium." |
| Dietary fat, saturated fat, cholesterol, trans fatty acids and coronary heart disease | "A healthy diet low in saturated and trans fats may reduce the risk of heart disease. (Naming the food) is free of saturated and trans fats."                                                             |
| Fruits, vegetables and cancer                                                         | "A healthy diet rich in a variety of vegetables and fruit may help reduce the risk of some types of cancer."                                                                                              |
| Plant sterols and cholesterol lowering                                                | "Plant sterols help reduce [or help lower] cholesterol."                                                                                                                                                  |
| Oat products and cholesterol lowering                                                 | "1 cup (X g) of <i>Brand X</i> (naming the food) supplies X % of the daily amount of the fibres shown to help reduce cholesterol"                                                                         |
| Psyllium products and cholesterol lowering                                            | 1 cup (X g) of <i>Brand X</i> (naming the food) with psyllium supplies X % of the daily amount of fibre shown to help lower cholesterol.                                                                  |

|                                           |                                                                                                                                                                                                                                    |
|-------------------------------------------|------------------------------------------------------------------------------------------------------------------------------------------------------------------------------------------------------------------------------------|
| Unsaturated fat and cholesterol lowering  | "Replacing saturated fats with polyunsaturated and monounsaturated fats from vegetable oils helps lower cholesterol. X teaspoons (X mL) of this (naming the food) contains X% less saturated fat than X teaspoons (X g) of butter" |
| Barley products and cholesterol lowering  | 125 ml (1/2 cup) of <i>product</i> supplies X% of the daily amount of the fibre shown to help lower cholesterol                                                                                                                    |
| <b>Front-of-Pack claims<sup>4,5</sup></b> |                                                                                                                                                                                                                                    |
| <b>Nutrient Specific Systems</b>          | Systems with symbols that display the amount per serving of select nutrients or use symbols based on nutrient content claim criteria.                                                                                              |
| <b>Summary Indicator Systems</b>          | Systems with a single symbol, icon, or score that provide summary information about the nutrient content of a product.                                                                                                             |
| <b>Food Group/Ingredient Systems</b>      | Systems with symbols based on the presence of a food group or food ingredient.                                                                                                                                                     |
| <b>Hybrid Systems</b>                     | Systems where two or more of the NSS, FGIS or SIS were displayed.                                                                                                                                                                  |
| <b>Calorie Specific Systems</b>           | Systems that only display calorie or energy content.                                                                                                                                                                               |

1. All approved variation in wording included.
2. Classified according to Canadian regulations (sections B.01.503 to B.01.513 of the Food and Drug Regulations)
3. Classified according to Canadian regulations (sections B.01.601 to B.01.603 of the Food and Drug Regulations)
4. As original defined by The National Academy of Medicine as described in The National Academies of Sciences Engineering Medicine (formerly Institute of Medicine) "*Examination of Front-of-Package Nutrition Rating Systems and Symbols: Phase I Report*". 2010
5. Because these claims were not specifically regulated by the Government, a decision tree was developed to classify front-of-pack symbols, as described in detail in *Franco-Arellano, B., J.T. Bernstein, S. Norsen, A. Schermel, and M.R. L'Abbé, Assessing nutrition and other claims on food labels: a repeated cross-sectional analysis of the Canadian food supply. BMC Nutrition, 2017. 3(1): p. 74.*

**Supplementary Table 2. Proportion of foods and beverages with and without nutrition claims that would or would not be eligible to carry claims (as determined by the FSANZ-NPSC), per type of claim (n=15,184).**

| Type of claim                 | Claim | Healthier |      |       | Less healthy |       | p       |
|-------------------------------|-------|-----------|------|-------|--------------|-------|---------|
|                               |       | n         | n    | %     | n            | %     |         |
| ANY NUTRITION CLAIM           | Yes   | 6990      | 4060 | 58.1% | 2930         | 41.9% | p<0.001 |
|                               | No    | 8194      | 2793 | 34.1% | 5401         | 65.9% |         |
| ANY NUTRIENT CONTENT CLAIM    | Yes   | 6501      | 3814 | 58.7% | 2687         | 41.3% | p<0.001 |
|                               | No    | 8683      | 3039 | 35.0% | 5644         | 65.0% |         |
| <i>Total fat claims</i>       | Yes   | 1827      | 1068 | 58.5% | 759          | 41.5% | p<0.001 |
|                               | No    | 13357     | 5785 | 43.3% | 7572         | 56.7% |         |
| <i>Saturated fat claims</i>   | Yes   | 893       | 496  | 55.5% | 397          | 44.5% | p<0.001 |
|                               | No    | 14291     | 6357 | 44.5% | 7934         | 55.5% |         |
| <i>Trans fat claims</i>       | Yes   | 1706      | 756  | 44.3% | 950          | 55.7% | p=0.49  |
|                               | No    | 13478     | 6097 | 45.2% | 7381         | 54.8% |         |
| <i>Cholesterol fat claims</i> | Yes   | 798       | 447  | 56.0% | 351          | 44.0% | p<0.001 |

|                                         |     |       |      |       |      |       |         |
|-----------------------------------------|-----|-------|------|-------|------|-------|---------|
|                                         | No  | 14386 | 6406 | 44.5% | 7980 | 55.5% |         |
| <i>Omega 3&amp;6 fatty acids claims</i> | Yes | 445   | 294  | 66.1% | 151  | 33.9% | p<0.001 |
|                                         | No  | 14739 | 6559 | 44.5% | 8180 | 55.5% |         |
| <i>Vitamins &amp; Minerals</i>          | Yes | 2270  | 1593 | 70.2% | 677  | 29.8% | p<0.001 |
|                                         | No  | 12914 | 5260 | 40.7% | 7654 | 59.3% |         |
| <i>Fibre claims</i>                     | Yes | 1247  | 966  | 77.5% | 281  | 22.5% | p<0.001 |
|                                         | No  | 13937 | 5887 | 42.2% | 8050 | 57.8% |         |
| <i>Sodium claims</i>                    | Yes | 754   | 547  | 72.5% | 207  | 27.5% | p<0.001 |
|                                         | No  | 14430 | 6306 | 43.7% | 8124 | 56.3% |         |
| <i>Sugar claims</i>                     | Yes | 784   | 602  | 76.8% | 182  | 23.2% | p<0.001 |
|                                         | No  | 14400 | 6251 | 43.4% | 8149 | 56.6% |         |
| <i>Energy claims</i>                    | Yes | 371   | 212  | 57.1% | 159  | 42.9% | p<0.001 |
|                                         | No  | 14813 | 6641 | 44.8% | 8172 | 55.2% |         |
| <i>Protein claims</i>                   | Yes | 426   | 306  | 71.8% | 120  | 28.2% | p<0.001 |
|                                         | No  | 14758 | 6547 | 44.4% | 8211 | 55.6% |         |
| <i>Lean claims</i>                      | Yes | 69    | 36   | 52.2% | 33   | 47.8% | p=0.29  |
|                                         | No  | 15115 | 6817 | 45.1% | 8298 | 54.9% |         |
| ANY DISEASE RISK REDUCTION CLAIM        | Yes | 226   | 177  | 78.3% | 49   | 21.7% | p<0.001 |
|                                         | No  | 14958 | 6676 | 44.6% | 8282 | 55.4% |         |
| ANY FRONT-OF-PACK SYMBOL                | Yes | 3056  | 1946 | 63.7% | 1110 | 36.3% | p<0.001 |
|                                         | No  | 12128 | 4907 | 40.5% | 7221 | 59.5% |         |
| <i>Nutrient Specific Symbols</i>        | Yes | 1033  | 622  | 60.2% | 411  | 39.8% | p<0.001 |
|                                         | No  | 14151 | 6231 | 44.0% | 7920 | 56.0% |         |
| <i>Summary Indicator Symbols</i>        | Yes | 723   | 521  | 72.1% | 202  | 27.9% | p<0.001 |
|                                         | No  | 14461 | 6332 | 43.8% | 8129 | 56.2% |         |
| <i>Food Group/Ingredient Symbols</i>    | Yes | 726   | 430  | 59.2% | 296  | 40.8% | p<0.001 |
|                                         | No  | 14458 | 6423 | 44.4% | 8035 | 55.6% |         |
| <i>Hybrid Symbols</i>                   | Yes | 724   | 570  | 78.7% | 154  | 21.3% | p<0.001 |
|                                         | No  | 14460 | 6283 | 43.5% | 8177 | 56.5% |         |
| <i>Calorie Specific Symbols</i>         | Yes | 491   | 268  | 54.6% | 223  | 45.4% | p<0.001 |
|                                         | No  | 14693 | 6585 | 44.8% | 8108 | 55.2% |         |

Nutrition claims (e.g., nutrient content claims, health claims and front-of-pack symbols) are described as “any representation which states, suggests or implies that a food has particular nutritional properties including, but not limited to, the energy value and to the content of protein, fat and carbohydrates, as well as the content of vitamins and minerals”. Nutrient content claims are those that “describe the amount of a nutrient in a food” (e.g., “excellent source of calcium”). Health claims are “any representation in labelling or advertising that states, suggests, or implies that a relationship exists between consumption of a food or an ingredient in the food and a person’s health”, and comprises two subtypes: disease risk reduction claims (e.g. “a healthy diet rich in a variety of vegetables and fruit may help reduce the risk of some types of cancer”) and nutrient-function claims (e.g., “This product is a source of calcium. Calcium helps build strong bones and teeth”). Detailed information in sections B.01.503 to B.01.513 and B.01.601 to B01.603 of

the Canadian *Food and Drug Regulations (nutrition labelling, nutrient content claims and health claims)* 2003. The National Academy of Medicine has defined, in its report "*Examination of Front-of-Package Nutrition Rating Systems and Symbols: Phase I Report*" (2010), FOP symbols as "systems that use nutrient criteria and symbols to indicate that a product has certain nutritional characteristics. Symbols are often placed on the principal display panel of the product, but may also be found on the side, top, or back panels or on shelf-tags". A product can carry more than one type of claim and the addition of the proportion of nutrition claims can exceed 100%. A product was considered not eligible to carry claims if it did not meet its corresponding threshold of the Food Standards Australia New Zealand Nutrient Profiling Scoring Criterion. Values per 100g/ml "as purchased" were used to determine the score. Statistically significant difference based on chi-square test ( $p < 0.05$ ).

**Supplementary Table 3. Comparison of the nutritional composition of foods and beverages with and without nutrition claims in food categories with substantial number of products (>40%) carrying claims.**

| Nutrient                         | Presence of claim | Nutrition Claims |      |      |          | Nutrient content claims |      |      |          | Disease risk reduction claims |      |      |          | Front-of-pack symbols |      |      |          |
|----------------------------------|-------------------|------------------|------|------|----------|-------------------------|------|------|----------|-------------------------------|------|------|----------|-----------------------|------|------|----------|
|                                  |                   | <i>n</i>         | Mean | SD   | <i>p</i> | <i>n</i>                | Mean | SD   | <i>p</i> | <i>n</i>                      | Mean | SD   | <i>p</i> | <i>n</i>              | Mean | SD   | <i>p</i> |
| <b>Bakery products (n=2,083)</b> |                   |                  |      |      |          |                         |      |      |          |                               |      |      |          |                       |      |      |          |
| Energy (Kcal per 100g/ml)        | Claim             | 1004             | 362  | 95   | p<0.001  | 896                     | 360  | 95   | p<0.001  | 23                            | 330  | 99   | p=0.02   | 484                   | 372  | 92   | p=0.187  |
|                                  | No Claim          | 1079             | 391  | 89   |          | 1187                    | 390  | 89   |          | 2060                          | 378  | 93   |          | 1599                  | 379  | 93   |          |
| Saturated Fat (g per 100g/ml)    | Claim             | 1004             | 2.5  | 3.1  | p<0.001  | 896                     | 2.3  | 3.0  | p<0.001  | 23                            | 1.6  | 1.3  | p=0.004  | 484                   | 2.5  | 2.6  | p<0.001  |
|                                  | No Claim          | 1079             | 6.1  | 5.1  |          | 1187                    | 5.9  | 5.1  |          | 2060                          | 4.4  | 4.7  |          | 1599                  | 4.9  | 5.0  |          |
| Sodium (mg per 100g/ml)          | Claim             | 1004             | 468  | 281  | p<0.001  | 896                     | 476  | 288  | p<0.001  | 23                            | 373  | 147  | p=0.534  | 484                   | 480  | 277  | p<0.001  |
|                                  | No Claim          | 1079             | 397  | 264  |          | 1187                    | 397  | 259  |          | 2060                          | 432  | 276  |          | 1599                  | 416  | 272  |          |
| Sugar (g per 100g/ml)            | Claim             | 1004             | 12.2 | 12.7 | p<0.001  | 896                     | 11.4 | 12.5 | p<0.001  | 23                            | 12.5 | 10.5 | p=0.235  | 484                   | 12.7 | 12.2 | p<0.001  |
|                                  | No Claim          | 1079             | 21.4 | 15.2 |          | 1187                    | 21.2 | 15.0 |          | 2060                          | 17.0 | 14.8 |          | 1599                  | 18.3 | 15.3 |          |
| Protein (g per 100g/ml)          | Claim             | 1004             | 7.9  | 3.3  | p<0.001  | 896                     | 7.9  | 3.2  | p<0.001  | 373                           | 9.0  | 2.3  | p<0.001  | 484                   | 8.2  | 3.1  | p<0.001  |
|                                  | No Claim          | 1079             | 6.3  | 3.1  |          | 1187                    | 6.4  | 3.2  |          | 432                           | 7.0  | 3.3  |          | 1599                  | 6.7  | 3.2  |          |
| Fibre (g per 100g/ml)            | Claim             | 1004             | 4.8  | 3.8  | p<0.001  | 896                     | 4.7  | 3.9  | p<0.001  | 23                            | 6.6  | 2.2  | p<0.001  | 484                   | 5.7  | 4.0  | p<0.001  |
|                                  | No Claim          | 1079             | 2.4  | 2.3  |          | 1187                    | 2.7  | 2.6  |          | 2060                          | 3.5  | 3.4  |          | 1599                  | 2.9  | 2.8  |          |

**Supplementary Table 3. Cont.**

| Nutrient                | Presence of claim | Nutrition Claims |      |    |          | Nutrient content claims |      |    |          | Disease risk reduction claims |      |    |          | Front-of-pack symbols |      |    |          |
|-------------------------|-------------------|------------------|------|----|----------|-------------------------|------|----|----------|-------------------------------|------|----|----------|-----------------------|------|----|----------|
|                         |                   | <i>n</i>         | Mean | SD | <i>p</i> | <i>n</i>                | Mean | SD | <i>p</i> | <i>n</i>                      | Mean | SD | <i>p</i> | <i>n</i>              | Mean | SD | <i>p</i> |
| <b>Desserts (n=827)</b> |                   |                  |      |    |          |                         |      |    |          |                               |      |    |          |                       |      |    |          |

|                                      |          |     |      |      |         |     |      |      |         |     |     |     |     |     |      |      |         |
|--------------------------------------|----------|-----|------|------|---------|-----|------|------|---------|-----|-----|-----|-----|-----|------|------|---------|
| <b>Energy (Kcal per 100g/ml)</b>     | Claim    | 384 | 129  | 81   | p<0.001 | 348 | 129  | 85   | p<0.001 | 2   | n/a | n/a | n/a | 185 | 124  | 77   | p<0.001 |
|                                      | No Claim | 443 | 151  | 75   |         | 479 | 149  | 72   |         | 825 | n/a | n/a |     | 642 | 146  | 78   |         |
| <b>Saturated Fat (g per 100g/ml)</b> | Claim    | 384 | 1.5  | 2.3  | p<0.001 | 348 | 1.4  | 2.3  | p<0.001 | 2   | n/a | n/a | n/a | 185 | 1.3  | 2.0  | p<0.001 |
|                                      | No Claim | 443 | 4.5  | 3.6  |         | 479 | 4.4  | 3.5  |         | 825 | n/a | n/a |     | 642 | 3.7  | 3.6  |         |
| <b>Sodium (mg per 100g/ml)</b>       | Claim    | 384 | 157  | 399  | p<0.001 | 348 | 168  | 417  | p<0.001 | 2   | n/a | n/a | n/a | 185 | 189  | 495  | p=0.09  |
|                                      | No Claim | 443 | 59   | 54   |         | 479 | 59   | 54   |         | 825 | n/a | n/a |     | 642 | 80   | 164  |         |
| <b>Sugar (g per 100g/ml)</b>         | Claim    | 384 | 17.9 | 18.8 | p=0.487 | 348 | 18.1 | 19.7 | p<0.001 | 2   | n/a | n/a | n/a | 185 | 17.1 | 17.4 | p=0.903 |
|                                      | No Claim | 443 | 15.0 | 8.8  |         | 479 | 15.1 | 8.5  |         | 825 | n/a | n/a |     | 642 | 16.1 | 13.4 |         |
| <b>Protein (g per 100g/ml)</b>       | Claim    | 384 | 2.9  | 4.8  | p=0.046 | 348 | 3.0  | 5.1  | p=0.019 | 2   | n/a | n/a | n/a | 185 | 3.2  | 5.8  | p=0.642 |
|                                      | No Claim | 443 | 1.9  | 2.0  |         | 479 | 1.8  | 1.9  |         | 825 | n/a | n/a |     | 642 | 2.1  | 2.7  |         |
| <b>Fibre (g per 100g/ml)</b>         | Claim    | 384 | 0.4  | 0.8  | p=0.183 | 348 | 0.4  | 0.8  | p=0.021 | 2   | n/a | n/a | n/a | 185 | 0.5  | 0.7  | p=0.954 |
|                                      | No Claim | 443 | 0.5  | 0.8  |         | 479 | 0.5  | 0.8  |         | 825 | n/a | n/a |     | 642 | 0.5  | 0.8  |         |

**Supplementary Table 3. Cont.**

| Nutrient                             | Presence of claim | Nutrition Claims |      |     |          | Nutrient content claims |      |     |          | Disease risk reduction claims |      |     |          | Front-of-pack symbols |      |     |          |
|--------------------------------------|-------------------|------------------|------|-----|----------|-------------------------|------|-----|----------|-------------------------------|------|-----|----------|-----------------------|------|-----|----------|
|                                      |                   | <i>n</i>         | Mean | SD  | <i>p</i> | <i>n</i>                | Mean | SD  | <i>p</i> | <i>n</i>                      | Mean | SD  | <i>p</i> | <i>n</i>              | Mean | SD  | <i>p</i> |
| <b>Desserts toppings (n=115)</b>     |                   |                  |      |     |          |                         |      |     |          |                               |      |     |          |                       |      |     |          |
| <b>Energy (Kcal per 100g/ml)</b>     | Claim             | 20               | 267  | 114 | p=0.009  | 20                      | 267  | 114 | p=0.009  | 0                             | n/a  | n/a | n/a      | 5                     | n/a  | n/a | n/a      |
|                                      | No Claim          | 95               | 335  | 109 |          | 95                      | 335  | 109 |          | 115                           | n/a  | n/a |          | 110                   |      |     |          |
| <b>Saturated Fat (g per 100g/ml)</b> | Claim             | 20               | 0.9  | 1.7 | p=0.150  | 20                      | 0.9  | 1.7 | p=0.150  | 0                             | n/a  | n/a | n/a      | 5                     | n/a  | n/a | n/a      |
|                                      | No Claim          | 95               | 2.9  | 8.2 |          | 95                      | 2.9  | 8.2 |          | 115                           | n/a  | n/a |          | 110                   |      |     |          |

|                                |          |    |      |      |         |    |      |      |         |     |     |     |     |     |     |     |     |
|--------------------------------|----------|----|------|------|---------|----|------|------|---------|-----|-----|-----|-----|-----|-----|-----|-----|
| <b>Sodium (mg per 100g/ml)</b> | Claim    | 20 | 146  | 104  | p=0.903 | 20 | 146  | 104  | p=0.903 | 0   | n/a | n/a | n/a | 5   | n/a | n/a | n/a |
|                                | No Claim | 95 | 157  | 216  |         | 95 | 157  | 216  |         | 115 | n/a | n/a |     | 110 |     |     |     |
| <b>Sugar (g per 100g/ml)</b>   | Claim    | 20 | 39.3 | 18.9 | p=0.036 | 20 | 39.3 | 18.9 | p=0.036 | 0   | n/a | n/a | n/a | 5   | n/a | n/a | n/a |
|                                | No Claim | 95 | 49.1 | 19.6 |         | 95 | 49.1 | 19.6 |         | 115 | n/a | n/a |     | 110 |     |     |     |
| <b>Protein (g per 100g/ml)</b> | Claim    | 20 | 0.8  | 0.8  | p=0.025 | 20 | 0.8  | 0.8  | p=0.025 | 0   | n/a | n/a | n/a | 5   | n/a | n/a | n/a |
|                                | No Claim | 95 | 0.7  | 1.2  |         | 95 | 0.7  | 1.2  |         | 115 | n/a | n/a |     | 110 |     |     |     |
| <b>Fibre (g per 100g/ml)</b>   | Claim    | 20 | 0.8  | 1.1  | p=0.495 | 20 | 0.8  | 1.1  | p=0.495 | 0   | n/a | n/a | n/a | 5   | n/a | n/a | n/a |
|                                | No Claim | 95 | 0.8  | 1.4  |         | 95 | 0.8  | 1.4  |         | 115 | n/a | n/a |     | 110 |     |     |     |

**Supplementary Table 3. Cont.**

| Nutrient                             | Presence of claim | Nutrition Claims |      |      |          | Nutrient content claims |      |      |          | Disease risk reduction claims |      |     |          | Front-of-pack symbols |      |      |          |
|--------------------------------------|-------------------|------------------|------|------|----------|-------------------------|------|------|----------|-------------------------------|------|-----|----------|-----------------------|------|------|----------|
|                                      |                   | <i>n</i>         | Mean | SD   | <i>p</i> | <i>n</i>                | Mean | SD   | <i>p</i> | <i>n</i>                      | Mean | SD  | <i>p</i> | <i>n</i>              | Mean | SD   | <i>p</i> |
| <b>Fats and Oils (n=535)</b>         |                   |                  |      |      |          |                         |      |      |          |                               |      |     |          |                       |      |      |          |
| <b>Energy (Kcal per 100g/ml)</b>     | Claim             | 277              | 450  | 261  | p<0.001  | 272                     | 451  | 260  | p<0.001  | 20                            | n/a  | n/a | n/a      | 92                    | 384  | 263  | p<0.001  |
|                                      | No Claim          | 258              | 584  | 235  |          | 263                     | 580  | 238  |          | 515                           | n/a  | n/a |          | 443                   | 542  | 248  |          |
| <b>Saturated Fat (g per 100g/ml)</b> | Claim             | 277              | 7.8  | 10.4 | p<0.001  | 272                     | 7.8  | 10.4 | p<0.001  | 20                            | n/a  | n/a | n/a      | 92                    | 4.8  | 4.3  | p<0.001  |
|                                      | No Claim          | 258              | 11.9 | 13.9 |          | 263                     | 11.7 | 13.9 |          | 515                           | n/a  | n/a |          | 443                   | 10.8 | 13.2 |          |
| <b>Sodium (mg per 100g/ml)</b>       | Claim             | 277              | 657  | 606  | p=0.003  | 272                     | 651  | 599  | p=0.006  | 20                            | n/a  | n/a | n/a      | 92                    | 705  | 385  | p=0.01   |
|                                      | No Claim          | 258              | 489  | 493  |          | 263                     | 498  | 507  |          | 515                           | n/a  | n/a |          | 443                   | 549  | 587  |          |
| <b>Sugar (g per 100g/ml)</b>         | Claim             | 277              | 5.7  | 9.3  | p=0.288  | 272                     | 5.6  | 9.4  | p=0.363  | 20                            | n/a  | n/a | n/a      | 92                    | 5.7  | 7.5  | p=0.187  |
|                                      | No Claim          | 258              | 4.4  | 7.1  |          | 263                     | 4.5  | 7.1  |          | 515                           | n/a  | n/a |          | 443                   | 5.0  | 8.5  |          |

|                                |          |     |     |     |         |     |     |     |         |     |     |     |     |     |     |     |         |
|--------------------------------|----------|-----|-----|-----|---------|-----|-----|-----|---------|-----|-----|-----|-----|-----|-----|-----|---------|
| <b>Protein (g per 100g/ml)</b> | Claim    | 277 | 0.7 | 1.0 | p=0.016 | 272 | 0.7 | 1.0 | p=0.018 | 20  | n/a | n/a | n/a | 92  | 0.6 | 0.7 | p=0.811 |
|                                | No Claim | 258 | 0.5 | 0.8 |         | 263 | 0.5 | 0.8 |         | 515 | n/a | n/a |     | 443 | 0.6 | 0.9 |         |
| <b>Fibre (g per 100g/ml)</b>   | Claim    | 277 | 0.0 | 0.4 | p=0.171 | 272 | 0.0 | 0.5 | p=0.163 | 20  | n/a | n/a | n/a | 92  | 0.1 | 0.7 | p=0.217 |
|                                | No Claim | 258 | 0.0 | 0.0 |         | 263 | 0.0 | 0.0 |         | 515 | n/a | n/a |     | 443 | 0.0 | 0.2 |         |

**Supplementary Table 3. Cont.**

| Nutrient                                      | Presence of claim | Nutrition Claims |      |     |          | Nutrient content claims |      |     |          | Disease risk reduction claims |      |     |          | Front-of-pack symbols |      |     |          |
|-----------------------------------------------|-------------------|------------------|------|-----|----------|-------------------------|------|-----|----------|-------------------------------|------|-----|----------|-----------------------|------|-----|----------|
|                                               |                   | <i>n</i>         | Mean | SD  | <i>p</i> | <i>n</i>                | Mean | SD  | <i>p</i> | <i>n</i>                      | Mean | SD  | <i>p</i> | <i>n</i>              | Mean | SD  | <i>p</i> |
| <b>Meat, Poultry, and Substitutes (n=895)</b> |                   |                  |      |     |          |                         |      |     |          |                               |      |     |          |                       |      |     |          |
| <b>Energy (Kcal per 100g/ml)</b>              | Claim             | 312              | 183  | 82  | p<0.001  | 308                     | 183  | 81  | p<0.001  | 1                             | n/a  | n/a | n/a      | 116                   | 161  | 62  | p<0.001  |
|                                               | No Claim          | 583              | 235  | 85  |          | 587                     | 234  | 85  |          | 894                           | n/a  | n/a |          | 779                   | 225  | 87  |          |
| <b>Saturated Fat (g per 100g/ml)</b>          | Claim             | 312              | 2.7  | 3.4 | p<0.001  | 308                     | 2.7  | 3.4 | p<0.001  | 1                             | n/a  | n/a | n/a      | 116                   | 1.8  | 2.4 | p<0.001  |
|                                               | No Claim          | 583              | 5.7  | 3.9 |          | 587                     | 5.7  | 3.9 |          | 894                           | n/a  | n/a |          | 779                   | 5.1  | 4.0 |          |
| <b>Sodium (mg per 100g/ml)</b>                | Claim             | 312              | 676  | 420 | p<0.001  | 308                     | 673  | 420 | p<0.001  | 1                             | n/a  | n/a | n/a      | 116                   | 508  | 367 | p<0.001  |
|                                               | No Claim          | 583              | 819  | 465 |          | 587                     | 820  | 464 |          | 894                           | n/a  | n/a |          | 779                   | 808  | 454 |          |
| <b>Sugar (g per 100g/ml)</b>                  | Claim             | 312              | 2.1  | 4.7 | p=0.545  | 308                     | 2.2  | 4.7 | p=0.452  | 1                             | n/a  | n/a | n/a      | 116                   | 1.8  | 3.1 | p=0.411  |
|                                               | No Claim          | 583              | 1.8  | 3.3 |          | 587                     | 1.8  | 3.3 |          | 894                           | n/a  | n/a |          | 779                   | 1.9  | 4.0 |          |
| <b>Protein (g per 100g/ml)</b>                | Claim             | 312              | 18.3 | 7.5 | p<0.001  | 308                     | 18.3 | 7.5 | p<0.001  | 1                             | n/a  | n/a | n/a      | 116                   | 17.8 | 5.5 | p=0.001  |
|                                               | No Claim          | 583              | 16.5 | 5.2 |          | 587                     | 16.5 | 5.2 |          | 894                           | n/a  | n/a |          | 779                   | 17.0 | 6.2 |          |
|                                               | Claim             | 312              | 0.8  | 1.3 | p<0.001  | 308                     | 0.8  | 1.3 | p<0.001  | 1                             | n/a  | n/a | n/a      | 116                   | 1.1  | 1.5 | p<0.001  |



|                              |          |     |     |     |  |     |     |     |  |     |     |     |  |     |     |     |
|------------------------------|----------|-----|-----|-----|--|-----|-----|-----|--|-----|-----|-----|--|-----|-----|-----|
| <b>Fibre (g per 100g/ml)</b> | No Claim | 583 | 0.4 | 0.8 |  | 587 | 0.4 | 0.8 |  | 894 | n/a | n/a |  | 779 | 0.4 | 0.9 |
|------------------------------|----------|-----|-----|-----|--|-----|-----|-----|--|-----|-----|-----|--|-----|-----|-----|

Supplementary Table 3. Cont.

| Nutrient                              | Presence of claim | Nutrition Claims |                 |      |          | Nutrient content claims |                 |      |          | Disease risk reduction claims |                 |     |          | Front-of-pack symbols |                 |      |          |
|---------------------------------------|-------------------|------------------|-----------------|------|----------|-------------------------|-----------------|------|----------|-------------------------------|-----------------|-----|----------|-----------------------|-----------------|------|----------|
|                                       |                   | <i>n</i>         | Mea<br><i>n</i> | SD   | <i>p</i> | <i>n</i>                | Mea<br><i>n</i> | SD   | <i>p</i> | <i>n</i>                      | Mea<br><i>n</i> | SD  | <i>p</i> | <i>n</i>              | Mea<br><i>n</i> | SD   | <i>p</i> |
| <b>Miscellaneous category (n=449)</b> |                   |                  |                 |      |          |                         |                 |      |          |                               |                 |     |          |                       |                 |      |          |
| <b>Energy (Kcal per 100g/ml)</b>      | Claim             | 137              | 308             | 131  | p=0.568  | 132                     | 310             | 132  | p=0.803  | 0                             | n/a             | n/a | n/a      | 21                    | 338             | 75   | p=0.634  |
|                                       | No Claim          | 312              | 298             | 159  |          | 317                     | 297             | 158  |          | 449                           | n/a             | n/a |          | 428                   | 299             | 154  |          |
| <b>Saturated Fat (g per 100g/ml)</b>  | Claim             | 137              | 5.3             | 29.4 | p=0.511  | 132                     | 1.1             | 1.9  | p=0.833  | 0                             | n/a             | n/a | n/a      | 21                    | 28.4            | 72.2 | p=0.813  |
|                                       | No Claim          | 312              | 1.5             | 2.8  |          | 317                     | 3.3             | 19.6 |          | 449                           | n/a             | n/a |          | 428                   | 1.4             | 2.6  |          |
| <b>Sodium (mg per 100g/ml)</b>        | Claim             | 137              | 2669            | 4475 | p=0.055  | 132                     | 2759            | 4535 | p=0.147  | 0                             | n/a             | n/a | n/a      | 21                    | 739             | 843  | p=0.003  |
|                                       | No Claim          | 312              | 4726            | 7891 |          | 317                     | 4656            | 7848 |          | 449                           | n/a             | n/a |          | 428                   | 4263            | 7215 |          |
| <b>Sugar (g per 100g/ml)</b>          | Claim             | 137              | 19.2            | 18.0 | p=0.016  | 132                     | 18.9            | 17.8 | p=0.030  | 0                             | n/a             | n/a | n/a      | 21                    | 20.6            | 19.3 | p=0.302  |
|                                       | No Claim          | 312              | 16.9            | 22.5 |          | 317                     | 17.0            | 22.6 |          | 449                           | n/a             | n/a |          | 428                   | 17.4            | 21.4 |          |
| <b>Protein (g per 100g/ml)</b>        | Claim             | 137              | 8.8             | 7.1  | p=0.430  | 132                     | 8.9             | 7.1  | p=0.262  | 0                             | n/a             | n/a | n/a      | 21                    | 7.2             | 4.2  | p=0.890  |
|                                       | No Claim          | 312              | 9.3             | 9.6  |          | 317                     | 9.2             | 9.5  |          | 449                           | n/a             | n/a |          | 428                   | 9.2             | 9.0  |          |
| <b>Fibre (g per 100g/ml)</b>          | Claim             | 137              | 4.1             | 5.7  | p<0.001  | 132                     | 4.1             | 5.8  | p=0.001  | 0                             | n/a             | n/a | n/a      | 21                    | 6.4             | 7.6  | p=0.032  |
|                                       | No Claim          | 312              | 2.9             | 6.2  |          | 317                     | 2.9             | 6.2  |          | 449                           | n/a             | n/a |          | 428                   | 3.1             | 6.0  |          |

Supplementary Table 3. Cont.

| Nutrient                               | Presence of claim | Nutrition Claims |      |      |          | Nutrient content claims |      |      |          | Disease risk reduction claims |      |     |          | Front-of-pack symbols |      |      |          |
|----------------------------------------|-------------------|------------------|------|------|----------|-------------------------|------|------|----------|-------------------------------|------|-----|----------|-----------------------|------|------|----------|
|                                        |                   | <i>n</i>         | Mean | SD   | <i>p</i> | <i>n</i>                | Mean | SD   | <i>p</i> | <i>n</i>                      | Mean | SD  | <i>p</i> | <i>n</i>              | Mean | SD   | <i>p</i> |
| <b>Sauces, Dips, Gravies (n=1,223)</b> |                   |                  |      |      |          |                         |      |      |          |                               |      |     |          |                       |      |      |          |
| Energy (Kcal per 100g/ml)              | Claim             | 238              | 149  | 119  | p=0.332  | 228                     | 152  | 121  | p=0.448  | 0                             | n/a  | n/a | n/a      | 66                    | 90   | 66   | p<0.001  |
|                                        | No Claim          | 985              | 152  | 118  |          | 995                     | 152  | 117  |          | 1223                          | n/a  | n/a |          | 1157                  | 155  | 119  |          |
| Saturated Fat (g per 100g/ml)          | Claim             | 238              | 1.1  | 1.8  | p=0.004  | 228                     | 1.1  | 1.8  | p=0.010  | 0                             | n/a  | n/a | n/a      | 66                    | 0.8  | 1.2  | P=0.158  |
|                                        | No Claim          | 985              | 1.3  | 2.6  |          | 995                     | 1.3  | 2.6  |          | 1223                          | n/a  | n/a |          | 1157                  | 1.3  | 2.5  |          |
| Sodium (mg per 100g/ml)                | Claim             | 238              | 1562 | 2292 | p=0.036  | 228                     | 1612 | 2329 | p=0.097  | 0                             | n/a  | n/a | n/a      | 66                    | 750  | 1871 | p<0.001  |
|                                        | No Claim          | 985              | 1289 | 1892 |          | 995                     | 1280 | 1885 |          | 1223                          | n/a  | n/a |          | 1157                  | 1376 | 1980 |          |
| Sugar (g per 100g/ml)                  | Claim             | 238              | 9.7  | 12.7 | p=0.136  | 228                     | 9.9  | 13.0 | p=0.225  | 0                             | n/a  | n/a | n/a      | 66                    | 6.1  | 6.8  | p=0.231  |
|                                        | No Claim          | 985              | 12.6 | 15.3 |          | 995                     | 12.5 | 15.2 |          | 1223                          | n/a  | n/a |          | 1157                  | 12.4 | 15.1 |          |
| Protein (g per 100g/ml)                | Claim             | 238              | 4.8  | 6.2  | p<0.001  | 228                     | 4.8  | 6.3  | p<0.001  | 0                             | n/a  | n/a | n/a      | 66                    | 2.6  | 2.2  | p=0.139  |
|                                        | No Claim          | 985              | 2.6  | 3.3  |          | 995                     | 2.6  | 3.3  |          | 1223                          | n/a  | n/a |          | 1157                  | 3.0  | 4.2  |          |
| Fibre (g per 100g/ml)                  | Claim             | 238              | 1.6  | 2.5  | p=0.006  | 228                     | 1.6  | 4.1  | p=0.029  | 0                             | n/a  | n/a | n/a      | 66                    | 1.5  | 1.3  | p<0.001  |
|                                        | No Claim          | 985              | 1.0  | 1.9  |          | 995                     | 1.1  | 1.9  |          | 1223                          | n/a  | n/a |          | 1157                  | 1.1  | 2.5  |          |

Supplementary Table 3. Cont.

| Nutrient                  | Presence of claim | Nutrition Claims |      |    |          | Nutrient content claims |      |    |          | Disease risk reduction claims |      |     |          | Front-of-pack symbols |      |    |          |
|---------------------------|-------------------|------------------|------|----|----------|-------------------------|------|----|----------|-------------------------------|------|-----|----------|-----------------------|------|----|----------|
|                           |                   | <i>n</i>         | Mean | SD | <i>p</i> | <i>n</i>                | Mean | SD | <i>p</i> | <i>n</i>                      | Mean | SD  | <i>p</i> | <i>n</i>              | Mean | SD | <i>p</i> |
| <b>Snacks (n=794)</b>     |                   |                  |      |    |          |                         |      |    |          |                               |      |     |          |                       |      |    |          |
| Energy (Kcal per 100g/ml) | Claim             | 478              | 486  | 90 | p<0.001  | 449                     | 488  | 90 | p<0.001  | 0                             | n/a  | n/a | n/a      | 177                   | 447  | 93 | p<0.001  |
|                           | No Claim          | 316              | 528  | 84 |          | 345                     | 522  | 87 |          | 794                           | n/a  | n/a |          | 617                   | 519  | 83 |          |

|                                      |          |     |      |      |         |     |      |      |         |     |     |     |     |     |      |      |         |
|--------------------------------------|----------|-----|------|------|---------|-----|------|------|---------|-----|-----|-----|-----|-----|------|------|---------|
| <b>Saturated Fat (g per 100g/ml)</b> | Claim    | 478 | 3.5  | 3.3  | p<0.001 | 449 | 3.4  | 3.2  | p<0.001 | 0   | n/a | n/a | n/a | 177 | 2.8  | 3.4  | p<0.001 |
|                                      | No Claim | 316 | 5.6  | 3.9  |         | 345 | 5.6  | 3.9  |         | 794 | n/a | n/a |     | 617 | 4.8  | 3.6  |         |
| <b>Sodium (mg per 100g/ml)</b>       | Claim    | 478 | 534  | 394  | p=0.105 | 449 | 529  | 393  | p=0.35  | 0   | n/a | n/a | n/a | 177 | 501  | 406  | p=0.371 |
|                                      | No Claim | 316 | 492  | 372  |         | 345 | 503  | 376  |         | 794 | n/a | n/a |     | 617 | 522  | 380  |         |
| <b>Sugar (g per 100g/ml)</b>         | Claim    | 478 | 11.4 | 20.3 | p=0.95  | 449 | 10.6 | 19.3 | p=0.164 | 0   | n/a | n/a | n/a | 177 | 18.3 | 25.8 | p<0.001 |
|                                      | No Claim | 316 | 11.3 | 14.3 |         | 345 | 12.4 | 16.4 |         | 794 | n/a | n/a |     | 617 | 9.4  | 14.7 |         |
| <b>Protein (g per 100g/ml)</b>       | Claim    | 478 | 9.0  | 6.7  | p<0.001 | 449 | 9.2  | 6.8  | p<0.001 | 0   | n/a | n/a | n/a | 177 | 8.1  | 6.8  | p<0.001 |
|                                      | No Claim | 316 | 13.1 | 7.5  |         | 345 | 12.5 | 7.5  |         | 794 | n/a | n/a |     | 617 | 11.3 | 7.3  |         |
| <b>Fibre (g per 100g/ml)</b>         | Claim    | 478 | 5.6  | 3.7  | p=0.525 | 449 | 5.7  | 3.7  | p=0.515 | 0   | n/a | n/a | n/a | 177 | 5.9  | 4.8  | p=0.89  |
|                                      | No Claim | 316 | 5.8  | 3.5  |         | 345 | 5.6  | 3.5  |         | 794 | n/a | n/a |     | 617 | 5.6  | 3.2  |         |

**Supplementary Table 3. Cont.**

| Nutrient                             | Presence of claim | Nutrition Claims |      |     |          | Nutrient content claims |      |     |          | Disease risk reduction claims |      |     |          | Front-of-pack symbols |      |     |          |
|--------------------------------------|-------------------|------------------|------|-----|----------|-------------------------|------|-----|----------|-------------------------------|------|-----|----------|-----------------------|------|-----|----------|
|                                      |                   | <i>n</i>         | Mean | SD  | <i>p</i> | <i>n</i>                | Mean | SD  | <i>p</i> | <i>n</i>                      | Mean | SD  | <i>p</i> | <i>n</i>              | Mean | SD  | <i>p</i> |
| <b>Sugars and Sweets (n=739)</b>     |                   |                  |      |     |          |                         |      |     |          |                               |      |     |          |                       |      |     |          |
| <b>Energy (Kcal per 100g/ml)</b>     | Claim             | 147              | 300  | 153 | p<0.001  | 127                     | 284  | 151 | p<0.001  | 0                             | n/a  | n/a | n/a      | 40                    | 332  | 158 | p=0.08   |
|                                      | No Claim          | 592              | 395  | 136 |          | 612                     | 395  | 136 |          | 739                           | n/a  | n/a |          | 699                   | 378  | 144 |          |
| <b>Saturated Fat (g per 100g/ml)</b> | Claim             | 147              | 5.0  | 7.8 | p<0.001  | 127                     | 4.1  | 7.7 | p<0.001  | 0                             | n/a  | n/a | n/a      | 40                    | 6.3  | 7.0 | p=0.61   |
|                                      | No Claim          | 592              | 8.3  | 9.6 |          | 612                     | 8.4  | 9.6 |          | 739                           | n/a  | n/a |          | 699                   | 7.7  | 9.5 |          |
| <b>Sodium (mg per 100g/ml)</b>       | Claim             | 147              | 106  | 317 | p=0.002  | 127                     | 108  | 339 | p=0.008  | 0                             | n/a  | n/a | n/a      | 40                    | 72   | 106 | p=0.69   |
|                                      | No Claim          | 592              | 57   | 79  |          | 612                     | 58   | 80  |          | 739                           | n/a  | n/a |          | 699                   | 66   | 161 |          |

|                                |          |     |      |      |         |     |      |      |         |     |     |     |     |     |      |      |        |
|--------------------------------|----------|-----|------|------|---------|-----|------|------|---------|-----|-----|-----|-----|-----|------|------|--------|
| <b>Sugar (g per 100g/ml)</b>   | Claim    | 147 | 38.9 | 22.0 | p<0.001 | 127 | 38.2 | 22.2 | p<0.001 | 0   | n/a | n/a | n/a | 40  | 43.5 | 20.8 | p=0.02 |
|                                | No Claim | 592 | 53.3 | 14.6 |         | 612 | 53.0 | 14.9 |         | 739 | n/a | n/a |     | 699 | 50.8 | 17.0 |        |
| <b>Protein (g per 100g/ml)</b> | Claim    | 147 | 2.8  | 3.2  | p=0.54  | 127 | 2.6  | 3.1  | p=0.28  | 0   | n/a | n/a | n/a | 40  | 2.5  | 3.1  | p=0.30 |
|                                | No Claim | 592 | 3.4  | 3.6  |         | 612 | 3.5  | 3.6  |         | 739 | n/a | n/a |     | 699 | 3.4  | 3.6  |        |
| <b>Fibre (g per 100g/ml)</b>   | Claim    | 147 | 2.0  | 4.6  | p=0.25  | 127 | 1.5  | 3.1  | p=0.034 | 0   | n/a | n/a | n/a | 40  | 3.1  | 6.9  | p=0.55 |
|                                | No Claim | 592 | 1.5  | 2.7  |         | 612 | 1.7  | 3.2  |         | 739 | n/a | n/a |     | 699 | 1.6  | 2.8  |        |

All values are based on F&B nutrition information in their “as purchased” form, per 100g/ml. SD= Standard deviation. Nutrition claims include any nutrient content claims, health claims and/or front-of-pack symbols. Statistically significant difference (p<0.05) was determined by Student’s T-test or Mann-Whitney U tests (for those nutrients that were not normally distributed). N/A = Analyses could not be performed given the limited number of products in one group.
